# Supplementary material for: Differentiation and Molecular Properties of Mesenchymal Stem Cells Derived from Murine Induced Pluripotent Stem Cells Derived on Gelatin or Collagen
Source: Hindawi journal article supplement (doi:10.1155/2016/9013089), 2016-01-01
Supplement: f1 [file 9013089.f1.pdf]

## Supplementary Table 1

| GENE            | Forward                     | Reverse                     |
|-----------------|-----------------------------|-----------------------------|
| PDGFR- $\alpha$ | 5'-AATCCTGCAGACGAGAGCAC-3'  | 5'-GCCACCAAGGGAAAAGATTT-3'  |
| PDGFR- $\beta$  | 5'-GTCTGGTCTTTTGGGATCCT-3'  | 5'-AAGGCTGGTTACAGTTTGGC-3'  |
| $\beta$ actin   | 5'-CCTAAGGCCAACCGTGAAAAG-3' | 5'-TCTTCATGGTGCTAGGAGCCA-3' |
| SOX1            | 5'-CAATCTTGCATCCCGGTTC-3'   | 5'-ACCCAGGTCTTATCCCATCC-3'  |

Supplementary Table 1. Polymerase chain reaction primers for PDGFR $\alpha$ , PDGFR  $\beta$ , actin, and SOX1.

## Supplementary Table. 2

| Antibody                             | Conjugate | Clone       | Catalog No. | Supplier    |
|--------------------------------------|-----------|-------------|-------------|-------------|
| Anti-mouse CD11b                     | FITC      | M1/70       | 11-0112     | eBioscience |
| Anti-mouse/rat CD29 (Integrin beta1) | PE        | eBioHmb1-1  | 12-0291     | eBioscience |
| Anti-mouse CD31                      | PE        | 390         | 102407      | BioLegend   |
| Anti-mouse CD34                      | APC       | MEC14.7     | 119510      | BioLegend   |
| Anti-mouse/human CD44                | FITC      | IM7         | 11-0441     | eBioscience |
| Anti-mouse CD45                      | APC       | 30-F11      | 103112      | BioLegend   |
| Anti-mouse CD73                      | PE        | eBioTY/11.8 | 12-0731     | eBioscience |
| Anti-mouse CD90.2 (Thy-1.2)          | FITC      | 53-2.1      | 11-0902     | eBioscience |
| Anti-mouse CD105 (Endoglin)          | PE        | MJ7/18      | 12-1051     | eBioscience |
| Anti-mouse PDGFR- $\alpha$ (CD140a)  | APC       | APA5        | 135905      | BioLegend   |
| Anti-mouse Ly-6A/E (Sca-1)           | FITC      | D7          | 11-5981     | eBioscience |
| Rat IgG2a, k Isotype                 | FITC      | eBR2a       | 11-4321     | eBioscience |
|                                      | PE        | eBR2a       | 12-4321     | eBioscience |
|                                      | APC       | eBR2a       | 17-4321     | eBioscience |
| Rat IgG2b, k Isotype                 | FITC      | eB149/10H5  | 11-4031     | eBioscience |
|                                      | APC       | eB149/10H5  | 17-4031     | eBioscience |
| Rat IgG1, k Isotype                  | PE        | eBRG1       | 12-4301     | eBioscience |
| Armenian Hamster IgG Isotype         | PE        | eBio299Arm  | 12-4888     | eBioscience |

Supplementary Table 2. All antibodies used in this study.

## Supplementary Fig. 1

### A iPSCs/MEF cells

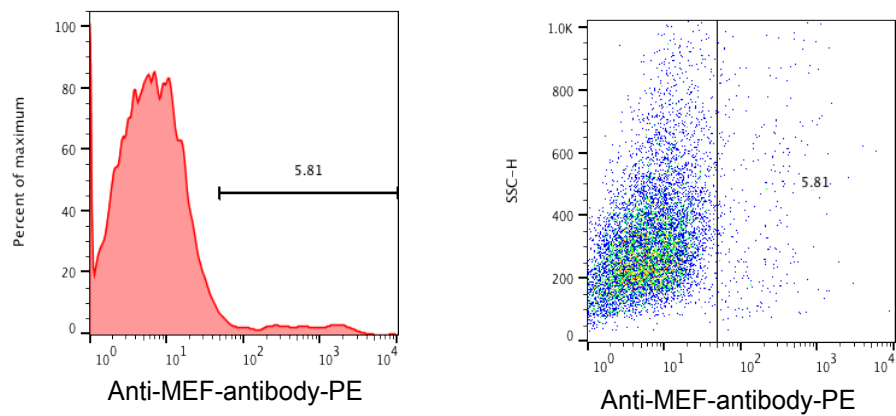

### B Cells passed through LC Column

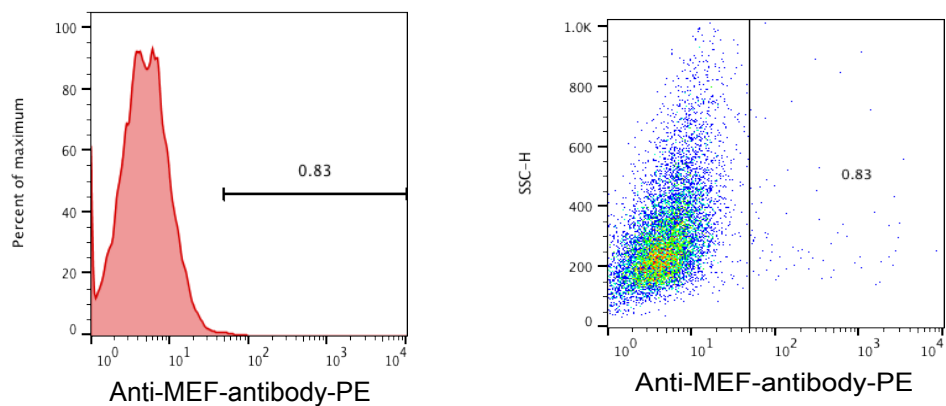

### C Cells collected with LC Column

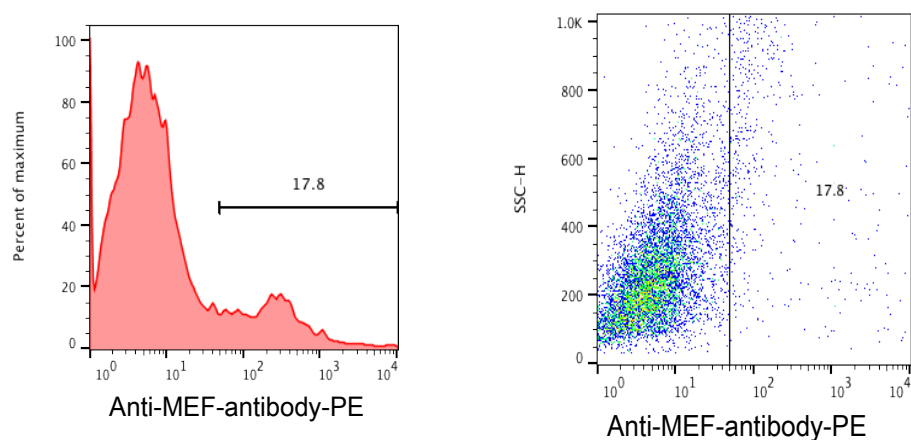

Supplementary Fig. 1. Removal of MEF cells using feeder removal microbeads and LC column. (A) FACS analysis of detached mixture solutions of iPSCs and MEF cells with anti-MEF antibody. (B) The mixture cells after incubation with feeder removal microbeads, were passed through LC column, and passage cells were collected. FACS analysis for passage cells was performed with anti-MEF antibody. (C) Cells attached to LC column were eluted and collected. FACS analysis of elution cells with anti-MEF antibody.



### Supplementary Fig.3

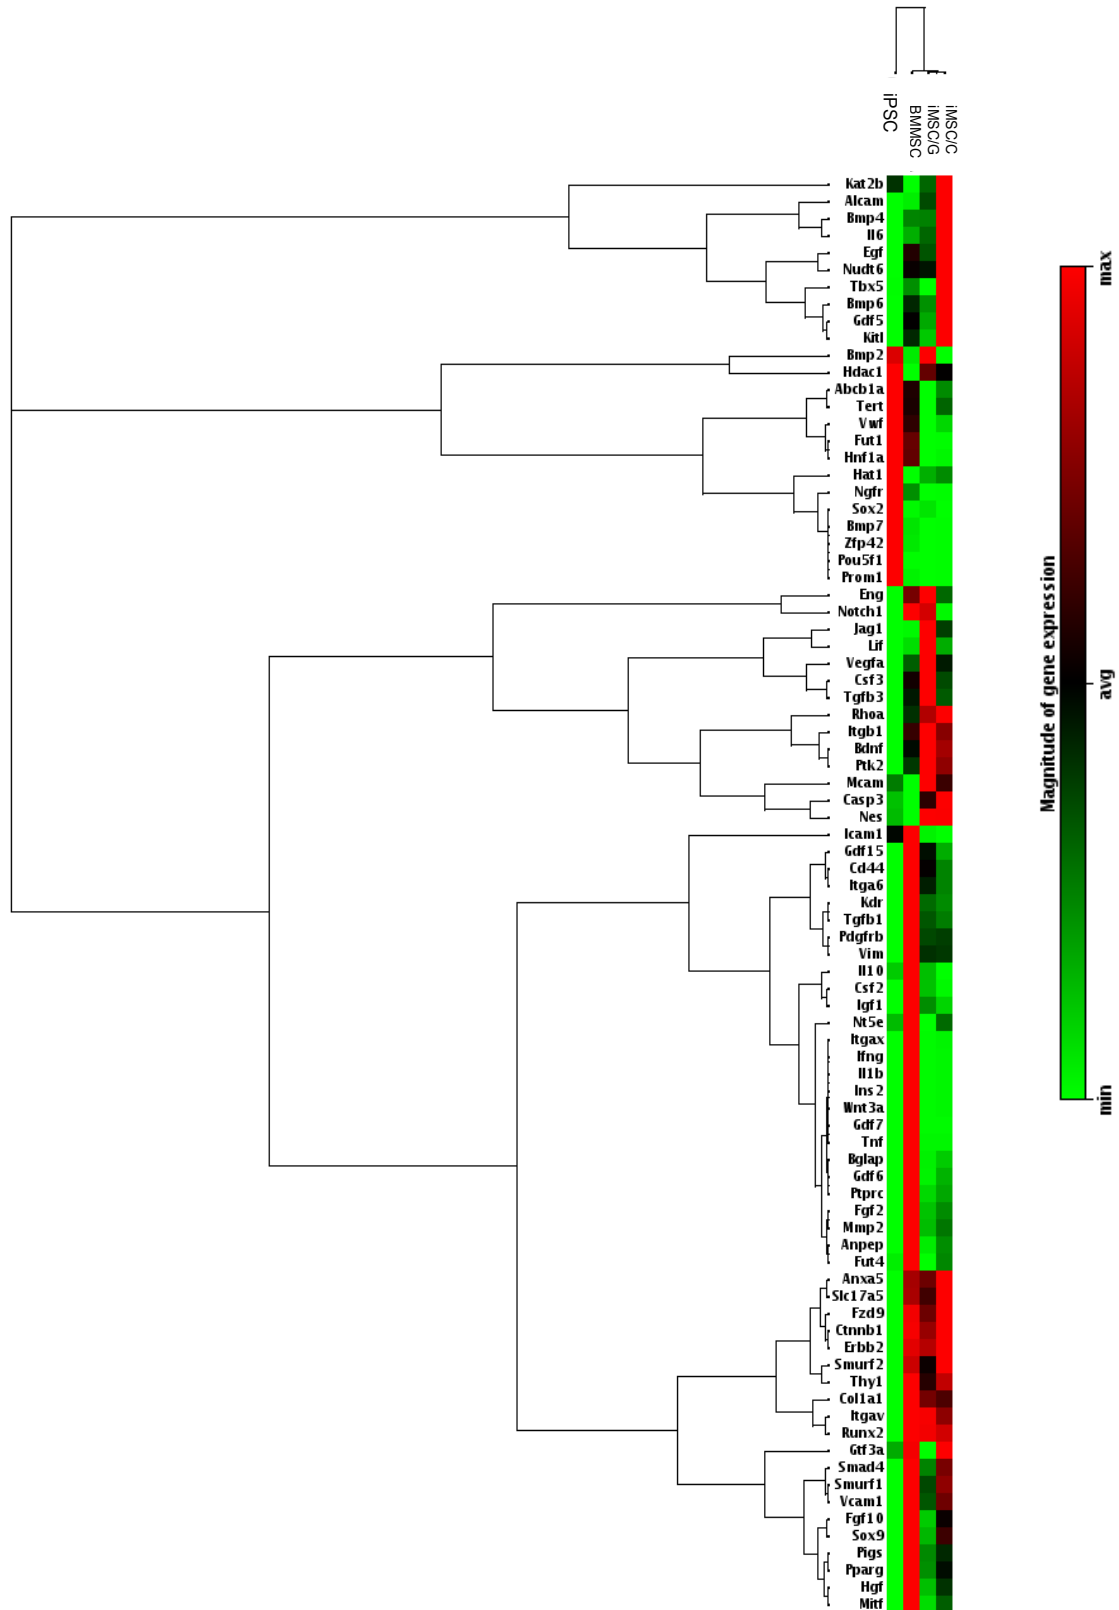

Supplementary Fig. 3. Microarray analysis of iMSCs/G, iMSCs/C, BMMSCs, and iPSCs. A clustering analysis by selecting 50 genes that were upregulated by 2 fold in BMMSCs relative to iPSCs. Each column represents average gene expression composed of three samples.

## Supplementary Fig.4

A

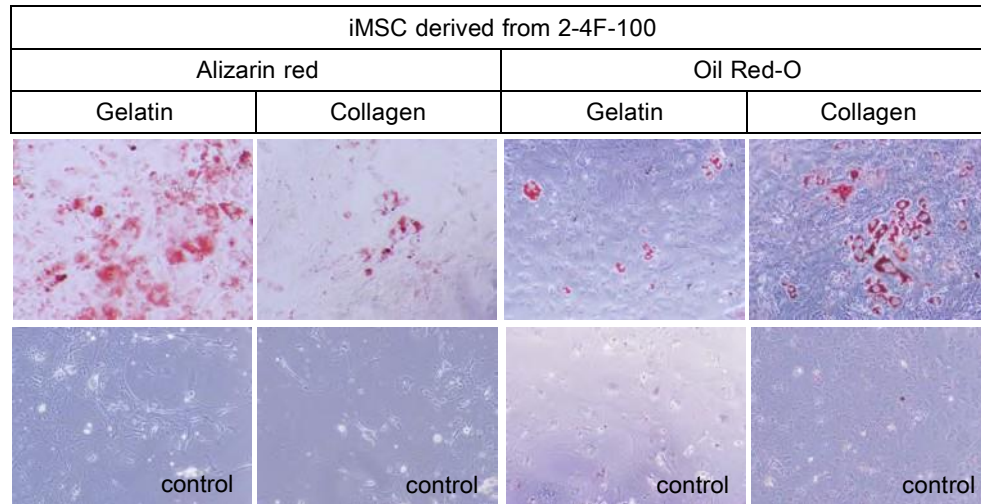

B

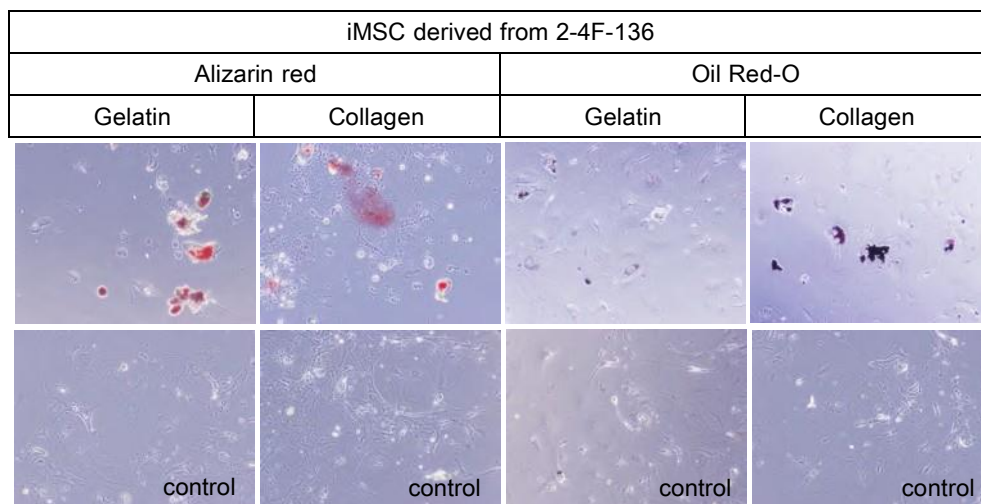

Supplementary Fig. 4. Osteogenic and adipogenic differentiation of P3 iMSC/G and C (2A-4F-100 and 2A-4F-136 lines). (A) P3-iMSCs (2A-4F-100) were cultured in medium containing osteogenic differentiation factors and stained with Alizarin red, and cultured in adipose-differentiation medium and stained with Oil Red-O at 12 days. (B) P3-iMSCs (2A-4F-136) were cultured in osteogenic differentiation factors and stained with Alizarin red, and cultured in adipose-differentiation medium and stained with Oil Red-O at 12 days.
